# Supplementary material for: Abnormal metaphase cytogenetics predicts venous thromboembolism in myeloma: derivation and validation of the PRISM score
Source: Oxford University Press journal article supplement (doi:10.1182/blood.2022015727), 2022-06-30
Supplement: blood_bld-2022-015727-mmc1.pdf [file blood_bld-2022-015727-mmc1.pdf]

| Table S1. TRIPOD Checklist   |      |     |                                                                                                                                                                                                       |                                            |
|------------------------------|------|-----|-------------------------------------------------------------------------------------------------------------------------------------------------------------------------------------------------------|--------------------------------------------|
| Section/Topic                | Item |     | Checklist Item                                                                                                                                                                                        | Page                                       |
| <b>Title and abstract</b>    |      |     |                                                                                                                                                                                                       |                                            |
| Title                        | 1    | D;V | Identify the study as developing and/or validating a multivariable prediction model, the target population, and the outcome to be predicted.                                                          | 1 (Lines 1-3)                              |
| Abstract                     | 2    | D;V | Provide a summary of objectives, study design, setting, participants, sample size, predictors, outcome, statistical analysis, results, and conclusions.                                               | 2                                          |
| <b>Introduction</b>          |      |     |                                                                                                                                                                                                       |                                            |
| Background and objectives    | 3a   | D;V | Explain the medical context (including whether diagnostic or prognostic) and rationale for developing or validating the multivariable prediction model, including references to existing models.      | 3 and 4 (Lines 1-15)                       |
|                              | 3b   | D;V | Specify the objectives, including whether the study describes the development or validation of the model or both.                                                                                     | 4 (Lines 11-15)                            |
| <b>Methods</b>               |      |     |                                                                                                                                                                                                       |                                            |
| Source of data               | 4a   | D;V | Describe the study design or source of data (e.g., randomized trial, cohort, or registry data), separately for the development and validation data sets, if applicable.                               | 4 (Lines 19-23 and 5 (Lines 1-11))         |
|                              | 4b   | D;V | Specify the key study dates, including start of accrual; end of accrual; and, if applicable, end of follow-up.                                                                                        | 4 (Lines 19-23 and 5 (Lines 1-11))         |
| Participants                 | 5a   | D;V | Specify key elements of the study setting (e.g., primary care, secondary care, general population) including number and location of centres.                                                          | 4 (Lines 19-23 and 5 (Lines 1-11))         |
|                              | 5b   | D;V | Describe eligibility criteria for participants.                                                                                                                                                       | 4 (Lines 19-23 and 5 (Lines 1-4))          |
|                              | 5c   | D;V | Give details of treatments received, if relevant.                                                                                                                                                     | Provided in Results                        |
| Outcome                      | 6a   | D;V | Clearly define the outcome that is predicted by the prediction model, including how and when assessed.                                                                                                | 5 (Lines 14-17)                            |
|                              | 6b   | D;V | Report any actions to blind assessment of the outcome to be predicted.                                                                                                                                | 5 (Lines 23-24)                            |
| Predictors                   | 7a   | D;V | Clearly define all predictors used in developing or validating the multivariable prediction model, including how and when they were measured.                                                         | 5 (Lines 16-23) and Table S2               |
|                              | 7b   | D;V | Report any actions to blind assessment of predictors for the outcome and other predictors.                                                                                                            | 5 (Lines 23-24)                            |
| Sample size                  | 8    | D;V | Explain how the study size was arrived at.                                                                                                                                                            | 6 (Lines 3-4)                              |
| Missing data                 | 9    | D;V | Describe how missing data were handled (e.g., complete-case analysis, single imputation, multiple imputation) with details of any imputation method.                                                  | 6 (Lines 14-15)                            |
| Statistical analysis methods | 10a  | D   | Describe how predictors were handled in the analyses.                                                                                                                                                 | 6 (Lines 8-15)                             |
|                              | 10b  | D   | Specify type of model, all model-building procedures (including any predictor selection), and method for internal validation.                                                                         | 6 (Lines 15-24) and 7 (Lines 1-2)          |
|                              | 10c  | V   | For validation, describe how the predictions were calculated.                                                                                                                                         | 6 (Lines 23-24) and 7 (Lines 1-2)          |
|                              | 10d  | D;V | Specify all measures used to assess model performance and, if relevant, to compare multiple models.                                                                                                   | 6 (Lines 15-24) and 7 (Lines 1-2)          |
|                              | 10e  | V   | Describe any model updating (e.g., recalibration) arising from the validation, if done.                                                                                                               | NA                                         |
| Risk groups                  | 11   | D;V | Provide details on how risk groups were created, if done.                                                                                                                                             | 6 (Lines 20-22)                            |
| Development vs. validation   | 12   | V   | For validation, identify any differences from the development data in setting, eligibility criteria, outcome, and predictors.                                                                         | 7 (Lines 1-2)                              |
| <b>Results</b>               |      |     |                                                                                                                                                                                                       |                                            |
| Participants                 | 13a  | D;V | Describe the flow of participants through the study, including the number of participants with and without the outcome and, if applicable, a summary of the follow-up time. A diagram may be helpful. | 7 (Lines 12-14)                            |
|                              | 13b  | D;V | Describe the characteristics of the participants (basic demographics, clinical features, available predictors), including the number of participants with missing data for predictors and outcome.    | 7 (Lines 14-24) and 8 (Lines 1-4). Table 1 |
|                              | 13c  | V   | For validation, show a comparison with the development data of the distribution of important variables (demographics, predictors and outcome).                                                        | 9 (Lines 22-25) and 10 (Lines 1-21)        |
| Model development            | 14a  | D   | Specify the number of participants and outcome events in each analysis.                                                                                                                               | 8 (Lines 19-24), 9, and 10 (Lines 1-21)    |
|                              | 14b  | D   | If done, report the unadjusted association between each candidate predictor and outcome.                                                                                                              | Table S2                                   |
| Model specification          | 15a  | D   | Present the full prediction model to allow predictions for individuals (i.e., all regression coefficients, and model intercept or baseline survival at a given time point).                           | 8 (Lines 19-24) and 9 (Lines 1-            |

|                           |     |     |                                                                                                                                                |                                     |
|---------------------------|-----|-----|------------------------------------------------------------------------------------------------------------------------------------------------|-------------------------------------|
|                           |     |     |                                                                                                                                                | 20), Tables 2 and 3                 |
|                           | 15b | D   | Explain how to use the prediction model.                                                                                                       | Table 2 and Figure 2                |
| Model performance         | 16  | D;V | Report performance measures (with CIs) for the prediction model.                                                                               | 9 (Lines 1-20)                      |
| Model-updating            | 17  | V   | If done, report the results from any model updating (i.e., model specification, model performance).                                            | NA                                  |
| <b>Discussion</b>         |     |     |                                                                                                                                                |                                     |
| Limitations               | 18  | D;V | Discuss any limitations of the study (such as nonrepresentative sample, few events per predictor, missing data).                               | 14 (Lines 8-18)                     |
| Interpretation            | 19a | V   | For validation, discuss the results with reference to performance in the development data, and any other validation data.                      | 13 (Lines 5-17)                     |
|                           | 19b | D;V | Give an overall interpretation of the results, considering objectives, limitations, results from similar studies, and other relevant evidence. | 11 (Lines 5-13)                     |
| Implications              | 20  | D;V | Discuss the potential clinical use of the model and implications for future research.                                                          | 14 (Lines 20-24) and 15 (Lines 1-2) |
| <b>Other information</b>  |     |     |                                                                                                                                                |                                     |
| Supplementary information | 21  | D;V | Provide information about the availability of supplementary resources, such as study protocol, Web calculator, and data sets.                  | Table S1 and S2                     |
| Funding                   | 22  | D;V | Give the source of funding and the role of the funders for the present study.                                                                  | NA                                  |

\*Items relevant only to the development of a prediction model are denoted by D, items relating solely to a validation of a prediction model are denoted by V, and items relating to both are denoted D;V. We recommend using the TRIPOD Checklist in conjunction with the TRIPOD Explanation and Elaboration document.

**Table S2. Univariable Analysis of Risk-Factors Associated with VTE in the Derivation Cohort**

| <b>Variable</b>                                                   | <b>Hazard Ratio<br/>(95% CI)</b> | <b>p-value</b> |
|-------------------------------------------------------------------|----------------------------------|----------------|
| <b>Year of Treatment (per 1-year increase)</b>                    | 1.05 (0.98-1.14)                 | 0.18           |
| <b>Age at treatment initiation (per 10-year increase)</b>         | 0.98 (0.82-1.19)                 | 0.87           |
| <b>Male sex</b>                                                   | 1.17 (0.76-1.81)                 | 0.48           |
| <b>Race:</b>                                                      |                                  |                |
| <b>Black vs white</b>                                             | 1.51 (0.92-2.45)                 | 0.10           |
| <b>Black vs not Black</b>                                         | 1.48 (0.91-2.40)                 | 0.12           |
| <b>Myeloma subtype:</b>                                           |                                  |                |
| <b>IgG vs others</b>                                              | 1.01 (0.59-1.72)                 | 0.97           |
| <b>Serum albumin (per 1 g/dl increase)</b>                        | 0.85 (0.62-1.17)                 | 0.32           |
| <b>B-2 microglobulin (per 5 mg/l increase)</b>                    | 1.04 (0.90-1.21)                 | 0.57           |
| <b>ISS stage at diagnosis (III vs I/II)</b>                       | 1.02 (0.63-1.64)                 | 0.94           |
| <b>Percent BMPC (per 10% increase)</b>                            | 1.02 (0.94-1.11)                 | 0.65           |
| <b>Serum M-protein (per 1 g/dl increase)</b>                      | 1.02 (0.91-1.15)                 | 0.68           |
| <b>Involved/Uninvolved sFLC ratio:<br/>&gt;80 (median) vs ≤80</b> | 1.25 (0.79-1.99)                 | 0.35           |
| <b>Abnormal metaphase cytogenetics (vs normal)</b>                | 1.69 (1.00-2.86)                 | 0.051          |
| <b>FISH cytogenetics (High-Risk* vs Standard-Risk)</b>            | 1.19 (0.66-2.15)                 | 0.55           |
| <b>LDH (&gt;UNL vs ≤UNL)</b>                                      | 1.22 (0.71-2.10)                 | 0.46           |
| <b>Serum creatinine (per 1 mg/dl increase)</b>                    | 1.04 (0.93-1.15)                 | 0.50           |

|                                                                    |                  |                 |
|--------------------------------------------------------------------|------------------|-----------------|
| <b>Serum calcium (per 1 mg/dl increase)</b>                        | 1.01 (0.88-1.15) | 0.92            |
| <b>Hemoglobin (per 1 g/dl increase)</b>                            | 0.96 (0.87-1.05) | 0.36            |
| <b>History of VTE (&gt;6 months prior to treatment initiation)</b> | 3.55 (1.36-9.26) | 0.010           |
| <b>History of ATE</b>                                              | 1.00 (0.48-2.05) | 0.99            |
| <b>BMI (per 1 kg/m<sup>2</sup> increase)</b>                       | 1.02 (0.99-1.05) | 0.14            |
| <b>Central Venous Catheter (Yes vs No)</b>                         | 0.80 (0.32-2.00) | 0.63            |
| <b>Pacemaker <i>in situ</i> (Yes vs No)</b>                        | NA               | 0.56; Gray test |
| <b>Cardiac disease<sup>1</sup> (Yes vs No)</b>                     | 0.87 (0.45-1.68) | 0.68            |
| <b>Diabetes mellitus (Yes vs No)</b>                               | 0.59 (0.29-1.20) | 0.15            |
| <b>Chronic kidney disease (Yes vs No)</b>                          | 0.77 (0.36-1.67) | 0.51            |
| <b>Total leukocyte count (per 1 x 10<sup>3</sup>/μl increase)</b>  | 1.02 (0.99-1.05) | 0.18            |
| <b>Platelet count (per 1 x 10<sup>3</sup>/μl increase)</b>         | 1.04 (0.99-1.10) | 0.14            |
| <b>Hypertension (Yes vs No)</b>                                    | 1.04 (0.67-1.60) | 0.87            |
| <b>Hyperlipidemia (Yes vs No)</b>                                  | 0.90 (0.55-1.47) | 0.67            |
| <b>Liver disease (Yes vs No)</b>                                   | 1.30 (0.42-4.04) | 0.56            |
| <b>Acute infection (within 90 days)</b>                            | 1.43 (0.55-3.69) | 0.46            |
| <b>Immobilization (within 90 days)</b>                             | 1.71 (1.10-2.65) | 0.017           |
| <b>Pelvic/femur/hip fracture (within 90 days)</b>                  | 2.22 (1.02-4.83) | 0.044           |
| <b>General surgery (within 90 days)</b>                            | 3.34 (1.99-5.59) | <0.001          |

|                                                                    |                  |                  |
|--------------------------------------------------------------------|------------------|------------------|
| <b>Anesthesia use (within 90 days)</b>                             | 1.89 (1.20-2.96) | 0.006            |
| <b>Trauma (within 90 days)</b>                                     | 1.67 (0.22-12.7) | 0.62             |
| <b>Erythropoietin use (Yes vs No)</b>                              | 1.72 (0.63-4.69) | 0.29             |
| <b>Pre-existing clotting disorder (Yes vs No)</b>                  | NA               | 0.79 (Gray test) |
| <b>Pre-existing autoimmune disease (Yes vs No)</b>                 | 0.45 (0.11-1.85) | 0.27             |
| <b>Hyperviscosity at diagnosis (Yes vs No)</b>                     | NA               | 0.52 (Gray test) |
| <b>Dexamethasone dose per cycle (mg)</b>                           |                  |                  |
| <b>120-160 vs &lt;120</b>                                          | 0.89 (0.52-1.53) | 0.68             |
| <b>&gt;160 vs &lt;120</b>                                          | 0.75 (0.25-2.25) | 0.60             |
| <b>Doxorubicin use in induction therapy (Yes vs No)</b>            | NA               | 0.55 (Gray test) |
| <b>Multi-agent cytotoxic chemotherapy in induction (Yes vs No)</b> | NA               | 0.73 (Gray test) |
| <b>Smoking history:</b>                                            |                  |                  |
| <b>Former vs never</b>                                             | 0.67 (0.36-1.24) | 0.20             |
| <b>Current vs never</b>                                            | 1.01 (0.58-1.74) | 0.98             |
| <b>IVIg use (Yes vs No)</b>                                        | 1.08 (0.14-8.17) | 0.94             |
| <b>IMiD use in induction therapy (Yes vs No)</b>                   | 1.83 (1.09-3.05) | 0.021            |
| <b>Initial Thromboprophylaxis Regimen:</b>                         |                  |                  |
| <b>LMWH vs None</b>                                                | 1.81 (0.61-5.36) | 0.28             |
| <b>ASA vs None</b>                                                 | 1.64 (1.00-2.68) | 0.048            |
| <b>LMWH or ASA vs None</b>                                         | 1.65 (1.01-2.68) | 0.044            |

Abbreviations: ISS: International Staging System ; BMPC: Bone Marrow Plasma Cells. sFLC: Serum Free Light Chain. FISH: Fluorescence in situ hybridization. LDH: Lactate Dehydrogenase. UNL: Upper Normal Limit. VTE: Venous Thromboembolism. ATE: Arterial Thromboembolism. BMI: Body Mass Index. NA: Not Applicable. IVIG: Intravenous Immunoglobulin. IMiD: Immunomodulatory Drug

\* High-risk was defined as presence of t(4;14), t(14;16), t(14;20), and/or del(17p) irrespective of the percentage of CD-138 selected cells harboring the abnormality.

! Cardiac disease included congestive heart failure, myocardial infarction or clinically significant coronary artery disease, and/or clinically significant arrhythmias.

**Table S3. Actual Distribution of PRISM Risk Score**

| <b>Risk Score</b> | <b>N (%)</b> | <b>Group</b> | <b>N (%)</b> |
|-------------------|--------------|--------------|--------------|
| <b>0</b>          | 116 (17.8)   | Low          | 116 (17.8)   |
| <b>1</b>          | 34 (5.2)     | Intermediate | 482 (74.0)   |
| <b>2</b>          | 304 (46.7)   |              |              |
| <b>3</b>          | 68 (10.4)    |              |              |
| <b>4</b>          | 49 (7.5)     |              |              |
| <b>5</b>          | 21 (3.2)     |              |              |
| <b>6</b>          | 6 (0.9)      |              |              |
| <b>7</b>          | 29 (4.5)     | High         | 53 (8.1)     |
| <b>8</b>          | 7 (1.1)      |              |              |
| <b>9</b>          | 8 (1.2)      |              |              |
| <b>10</b>         | 8 (1.2)      |              |              |
| <b>11</b>         | 1 (0.2)      |              |              |

**Table S4. Comparison of Baseline Demographic and Clinical Characteristics between Derivation and External Validation Cohorts**

| <b>Variable</b>                                                 | <b>Derivation Cohort</b> | <b>External Validation Cohort</b> | <b>p-value</b> |
|-----------------------------------------------------------------|--------------------------|-----------------------------------|----------------|
| <b>PRISM Score (median, range)</b>                              | 2 (0-11)                 | 2 (0-12)                          | 0.59           |
| <b>PRISM Risk Category (%)</b>                                  |                          |                                   |                |
| <b>Low</b>                                                      | 18                       | 22                                | 0.28           |
| <b>Intermediate</b>                                             | 74                       | 68                                |                |
| <b>High</b>                                                     | 8                        | 10                                |                |
| <b>Sex, Male (%)</b>                                            | 55                       | 53                                | 0.69           |
| <b>Race/Ethnicity</b>                                           |                          |                                   |                |
| <b>Non-Hispanic White</b>                                       | 79                       | 34                                | <0.001         |
| <b>Black</b>                                                    | 20                       | 22                                |                |
| <b>Hispanic</b>                                                 | 0                        | 38                                |                |
| <b>Asian/Pacific Islander</b>                                   | 0.5                      | 5                                 |                |
| <b>Others</b>                                                   | 1                        | 0.5                               |                |
| <b>Age at Treatment Initiation, median (range)</b>              | 63 (22-91)               | 67 (33-91)                        | <0.001         |
| <b>Thromboprophylaxis (%)</b>                                   |                          |                                   |                |
| <b>None</b>                                                     | 36                       | 40                                | 0.23           |
| <b>ASA</b>                                                      | 61                       | 56                                |                |
| <b>Prophylactic LMWH</b>                                        | 3                        | 4                                 |                |
| <b>IMiD use in Induction Regimen (%)</b>                        | 65                       | 45                                | <0.001         |
| <b>Abnormal Metaphase Cytogenetics (%)</b>                      | 18                       | 36                                | <0.001         |
| <b>Surgery within 90 days prior to treatment initiation (%)</b> | 9                        | 10                                | 0.87           |
| <b>Prior VTE (%)</b>                                            | 2                        | 2                                 | 0.89           |

Abbreviations: ASA-Aspirin. LMWH-Low Molecular weight Heparin. IMiD-Immunomodulatory Drug. VTE: Venous Thromboembolism.



**Table S5. Summary of Hazard Ratio for VTE between PRISM Risk Groups by Cohort**

| <b>Cohort</b>     | <b>Comparison</b>    | <b>Hazard Ratio (95% CI)</b> | <b>p-value</b> |
|-------------------|----------------------|------------------------------|----------------|
| <b>Derivation</b> | High vs Low          | 16.59 (4.91-56.07)           | <0.001         |
|                   | Intermediate vs Low  | 4.23 (1.32-13.55)            | 0.0152         |
|                   | Intermediate vs High | 0.26 (0.15-0.43)             | <0.001         |
| <b>Validation</b> | High vs Low          | 4.37 (1.04-18.3)             | 0.043          |
|                   | Intermediate vs Low  | 1.62 (0.47-5.59)             | 0.446          |
|                   | Intermediate vs High | 0.37 (0.14-1.02)             | 0.055          |

Abbreviations: VTE=Venous Thromboembolism.

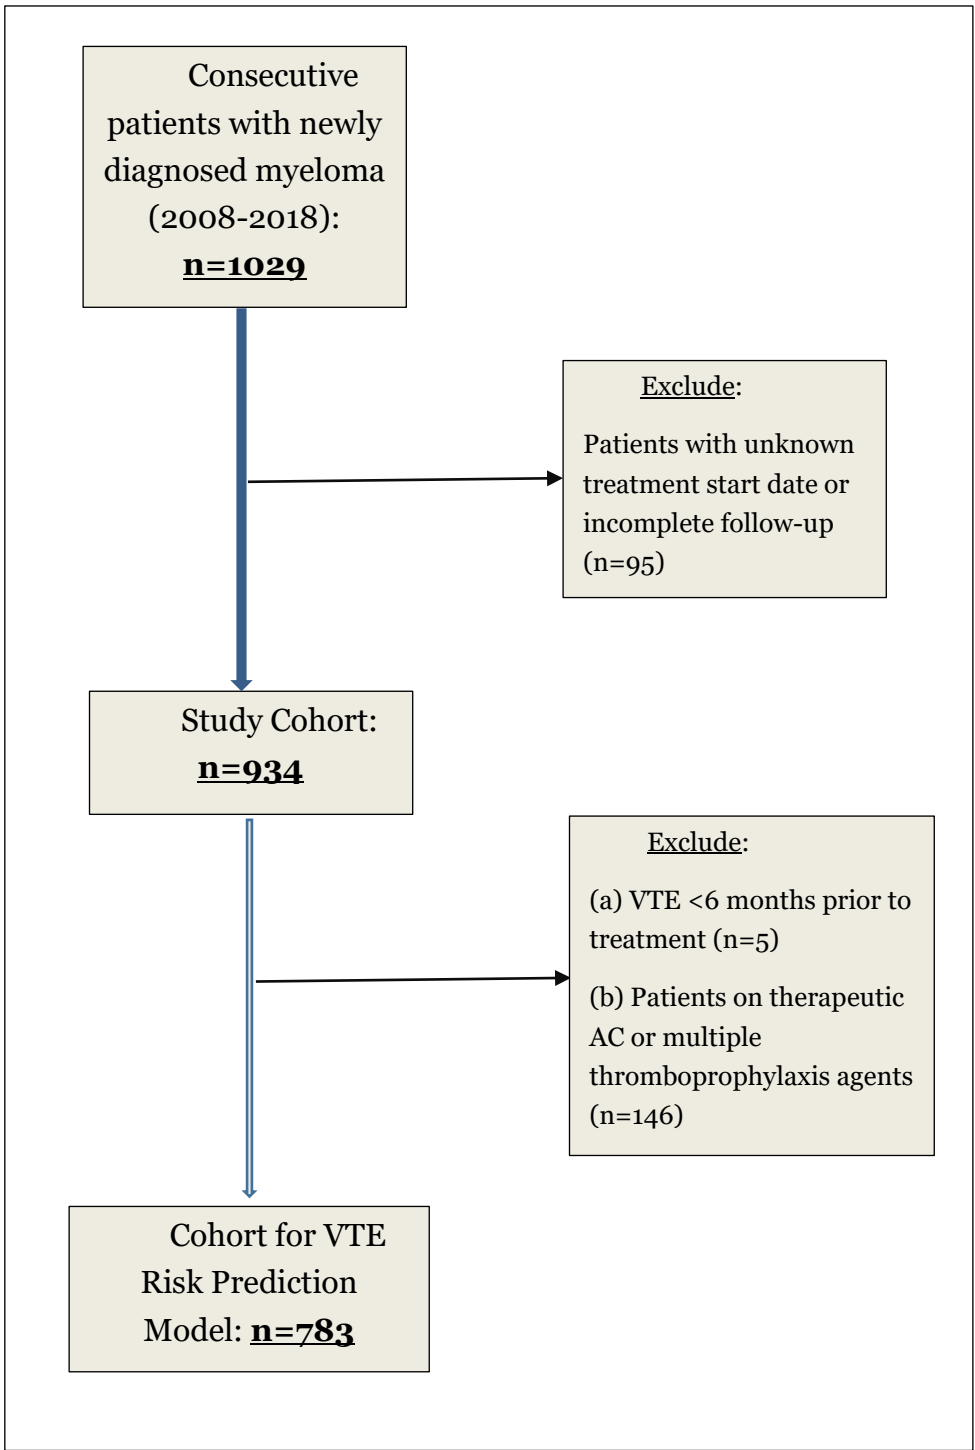

Figure S1. Flowchart for Patient Selection
